# Supplementary material for: Versatile and Low-Cost Fabrication of Modular Lock-and-Key Microfluidics for Integrated Connector Mixer Using a Stereolithography 3D Printing
Source: Micromachines (Basel). 2022 Jul 28;13(8):1197. doi: 10.3390/mi13081197 (PMC9413493; doi:10.3390/mi13081197)
Supplement: Supplementary file 1 [file micromachines-13-01197-s001.zip]

Archive with 8 entries (8 files):
- 1.3Circle-Kotak.stl
- 1.3denganLock.stl
- 1.3InletObserver.stl
- 1.3mmBelahKetupat.stl
- Panjang1.3-0.5.stl
- Spiral1.3.stl
- Supplementary Material.pdf
- Zig-zag1.3.stl
